# Supplementary material for: Novel High-Throughput Multiplex qPCRs for the Detection of Canine Vector-Borne Pathogens in the Asia-Pacific
Source: MDPI journal article supplement (doi:10.3390/microorganisms9051092), 2021-05-19
Supplement: s1 [file s1]

**Supplementary file 1. Target and non-target bacterial and protozoan 16S rRNA and 18S rRNA sequence accessions used in multiplex qPCR designs.**

To ensure specificity of Taq-Man probes to the target pathogen species a range of non-target sequences representing common pathogenic species as well as reagent and environmental bacterial contaminants were included.

| <b>Bacterial quadruplex design</b>         |                         | <b>Apicomplexan quadruplex design</b> |                         |
|--------------------------------------------|-------------------------|---------------------------------------|-------------------------|
| <b>Target species</b>                      | <b>NCBI accession #</b> | <b>Target species</b>                 | <b>NCBI accession #</b> |
| <i>Anaplasma platys</i>                    | EF139459.1              | <i>Babesia gibsoni</i>                | KC461261                |
|                                            | LC269822.1              |                                       | KF511956.1              |
|                                            | KU586001.1              |                                       | KC954653.1              |
|                                            | MK814413.1              | <i>Babesia vogeli</i>                 | AY371198.1              |
|                                            | LC269820.1              |                                       | KY290979.1              |
|                                            | AF536828.1              |                                       | AY371196.1              |
|                                            | MK121782.1              |                                       | HM590440.1              |
| <i>Ehrlichia canis</i>                     | U26740.1                | <i>Hepatozoon canis</i>               | KX712129.1              |
|                                            | AF536827.1              |                                       | AY150067                |
|                                            | EU106856.1              |                                       | DQ111754.1              |
|                                            | EU143637.1              |                                       | KJ634654.1              |
| <i>Mycoplasma haemocanis</i>               | KY117659.1              |                                       |                         |
|                                            | AY150973.1              |                                       |                         |
|                                            | EF416568.1              |                                       |                         |
| <i>Candidatus Mycoplasma haematoparvum</i> | AY532390.1              |                                       |                         |
|                                            | KY117661.1              |                                       |                         |
|                                            | GQ129114.1              |                                       |                         |
| <i>Mycoplasma haemofelis</i>               | EU145745.1              |                                       |                         |
| <i>Candidatus Mycoplasma haemominutum</i>  | AY150981.1              |                                       |                         |
| <i>Candidatus Mycoplasma turicensis</i>    | DQ464423.1              |                                       |                         |
| <i>Mycoplasma coccoides</i>                | AY171918.1              |                                       |                         |
| <i>Mycoplasma suis</i>                     | EU603330.1              |                                       |                         |
|                                            |                         |                                       |                         |
| <b>Non-target species</b>                  | <b>NCBI accession #</b> | <b>Non-target species</b>             | <b>NCBI accession #</b> |
| <i>Acinetobacter viviani</i>               | NR148847.1              | <i>Babesia canis</i>                  | L19079.1                |
| <i>Anaerobacillus alkalilacustris</i>      | NR115854.1              | <i>Babesia conradae</i>               | AF158702.1              |
| <i>Anaplasma phagocytophilum</i>           | DQ458808.2              | <i>Babesia divergens</i>              | LC477143.1              |
| <i>Bartonella clarridgeiae</i>             | NR036961.1              | <i>Babesia microti</i>                | AB241631.1              |
| <i>Bartonella henselae</i>                 | L35101.1                | <i>Babesia ovis</i>                   | AY998123.1              |
| <i>Bartonella vinsonii</i>                 | DQ228135.1              | <i>Hammondia hammondi</i>             | KT184369.1              |
| <i>Borrelia burgdorferi</i>                | GQ478290.1              | <i>Hammondia heydorni</i>             | KT184370.1              |

|                                           |            |                              |                |
|-------------------------------------------|------------|------------------------------|----------------|
| <i>Bradyrhizobium centrosematis</i>       | KC247115.1 | <i>Hepatozoon americanum</i> | AF176836       |
| <i>Candidatus Neoehrlichia mikurensis</i> | AB213021.1 | <i>Hepatozoon felis</i>      | KM435071       |
| <i>Candidatus Rickettsia asemboensis</i>  | JN315967.1 | <i>Hepatozoon sipedon</i>    | JN181157       |
| <i>Corynebacterium aurimucosum</i>        | AY536426.1 | <i>Leishmania donovani</i>   | XR_002966730.1 |
| <i>Ehrlichia chaffeensis</i>              | AF147752.2 | <i>Leishmania infantum</i>   | AJ634343.1     |
| <i>Ehrlichia ewingii</i>                  | NR044747.1 | <i>Plasmodium berghei</i>    | AJ243513       |
| <i>Enhydrobacter aerosaccus</i>           | AB641400.1 | <i>Plasmodium ovale</i>      | KF018656       |
| <i>Pseudomonas syringae</i>               | AB001448.1 | <i>Sarcocystis neurona</i>   | KT184371.1     |
| <i>Rickettsia conorii</i>                 | NR041934.1 | <i>Theileria annulata</i>    | EU083801       |
| <i>Rickettsia felis</i>                   | DQ102712.1 | <i>Theileria buffeli</i>     | DQ104611       |
| <i>Rickettsia rickettsii</i>              | L36217.1   | <i>Theileria ovis</i>        | AY260172       |
| <i>Rickettsia typhi</i>                   | NR118679.1 | <i>Theileria sergenti</i>    | EU083802       |
| <i>Sediminibacterium aquarii</i>          | NR152667.1 | <i>Theileria sinensis</i>    | KF559355       |
| <i>Sphingomonas ginsengisoli</i>          | AB245347.1 | <i>Toxoplasma gondii</i>     | L24381.1       |
| <i>Staphylococcus aureus</i>              | EF463060.1 | <i>Trypanosoma evansi</i>    | AJ009154.1     |
| <i>Stenotrophomonas maltophilia</i>       | FJ657669.1 |                              |                |
| <i>Streptococcus lutetiensis</i>          | NR037096.1 |                              |                |
